# Supplementary material
Source: PubMed Central journal article supplement (PMC4256149)
Supplement: NIHMS635671-supplement-2.pdf [file NIHMS635671-supplement-2.pdf]

## Supplementary Text

### Altered CNT-1 activity affects apoptosis induced by *smIs82*

We scored cell corpses in *smIs82* embryos to examine if loss of *cnt-1* is capable of suppressing cell death after the CED-3 caspase is globally activated. In the absence of the heat shock treatment, *smIs82* embryos showed a cell corpse profile similar to that of N2 embryos (**Supplementary Fig. 4c**). After the heat shock treatment, the numbers of cell corpses in *smIs82* embryos were dramatically increased (**Supplementary Fig. 4d**), indicating that many cells are induced to undergo apoptosis. We found that loss of *cnt-1* partially suppressed and expression of tCNT-1a enhanced ectopic cell death induced by *smIs82* (**Supplementary Fig. 4d**), providing further supporting evidence that *cnt-1* acts downstream of CED-3 to promote apoptosis. A similar partial suppression of cell death was accomplished by a gain-of-function *akt-1(mg144gf)* mutation (**Supplementary Fig. 4d**), confirming that *akt-1* can also inhibit cell death downstream of EGL-1 and CED-3.

## Supplementary Tables

**Supplementary Table 1** RNAi treatment of *cnt-1* caused a delay-of-cell-death phenotype similar to that of the *cps-2(sm8)* mutant.

| RNAi clone    | Cell death defect |
|---------------|-------------------|
| vector RNAi   | –                 |
| <i>tpi-1</i>  | –                 |
| Y17G7B.10     | –                 |
| <i>arrd-7</i> | –                 |
| <i>arrd-8</i> | –                 |
| <i>cnt-1</i>  | +                 |
| Y17G7B.17     | –                 |
| Y17G7B.18     | –                 |
| Y17G7B.19     | –                 |
| Y43F11A.1     | –                 |

N2 animals were treated with RNAi and cell corpses in embryos were scored as described in METHODS. For each RNAi experiment, 15 embryos each at the comma, 1.5 fold, 2 fold, 2.5 fold, 3 fold, and 4 fold embryonic stages were scored. The candidate genes tested and corresponding RNAi results are summarized above. “+” indicates that the RNAi clone caused a delay-of-cell-death defect. “–” indicates that there was no obvious cell death defect.

**Supplementary Table 2** Inactivation of *cnt-1* enhances suppression of cell death.

| Genotype                           | No. of extra cells | Range of extra cells |
|------------------------------------|--------------------|----------------------|
| N2                                 | 0.1 ± 0.1          | 0–1                  |
| <i>cnt-1(tm2313)</i>               | 0.1 ± 0.1          | 0–1                  |
| <i>ced-3(n2438)</i>                | 1.3 ± 0.3          | 0–3                  |
| <i>cnt-1(tm2313); ced-3(n2438)</i> | 3.5 ± 0.3*         | 2–6                  |
| <i>ced-4(n2273)</i>                | 2.2 ± 0.4          | 0–5                  |
| <i>cnt-1(tm2313); ced-4(n2273)</i> | 3.4 ± 0.4**        | 1–6                  |

Extra cells were scored in the anterior pharynx of L4 hermaphrodites using Nomarski optics as described in METHODS. Data shown are mean ± s.e.m. Statistical significance values were determined by one-way ANOVA, followed by Tukey's test ( $n = 20$  animals).

\*  $P < 0.001$ , compared with *ced-3(n2438)*. \*\*  $P < 0.05$ , compared with *ced-4(n2273)*.

**Supplementary Table 3** Expression of tCNT-1 causes ectopic cell death.

| Genotype                                          | No. of missing cells | Range of missing cells |
|---------------------------------------------------|----------------------|------------------------|
| N2                                                | $0 \pm 0$            | 0                      |
| <i>cnt-1(tm2313)</i>                              | $0 \pm 0$            | 0                      |
| <i>cnt-1</i> ; ex[P <sub>dpy-30</sub> tCNT-1a] #1 | $0.3 \pm 0.1^*$      | 0–1                    |
| <i>cnt-1</i> ; ex[P <sub>dpy-30</sub> tCNT-1a] #2 | $0.35 \pm 0.1^*$     | 0–1                    |
| <i>cnt-1</i> ; ex[P <sub>dpy-30</sub> tCNT-1a] #3 | $0.35 \pm 0.1^*$     | 0–1                    |
| <i>cnt-1</i> ; ex[P <sub>dpy-30</sub> tCNT-1b] #1 | $0.3 \pm 0.1^*$      | 0–1                    |
| <i>cnt-1</i> ; ex[P <sub>dpy-30</sub> tCNT-1b] #2 | $0.3 \pm 0.1^*$      | 0–1                    |
| <i>cnt-1</i> ; ex[P <sub>dpy-30</sub> tCNT-1b] #3 | $0.35 \pm 0.1^*$     | 0–1                    |

Missing cells were scored in the anterior pharynx of L4 transgenic hermaphrodites using Nomarski optics. Data shown are mean  $\pm$  s.e.m. Statistical significance values were determined by one-way ANOVA, followed by Tukey's test ( $n = 20$  animals).  $*P < 0.001$ , compared with *cnt-1(tm2313)* animals.

**Supplementary Table 4** Increased activity of *akt-1* and loss of *daf-18* both inhibit apoptosis.

| Genotype                                       | No. of extra cells | Range of extra cells |
|------------------------------------------------|--------------------|----------------------|
| N2                                             | 0.1 ± 0.1          | 0–1                  |
| <i>akt-1(mg144gf)</i>                          | 0.1 ± 0.1          | 0–1                  |
| <i>ced-3(n2438)</i>                            | 1.3 ± 0.3          | 0–3                  |
| <i>ced-3(n2438); akt-1(mg144gf)</i>            | 3.4 ± 0.4*         | 1–6                  |
| <i>daf-16(mu86)</i>                            | 0.1 ± 0.1          | 0–1                  |
| <i>daf-16(mu86); ced-3(n2438)</i>              | 3.5 ± 0.4*         | 1–6                  |
| <i>daf-18(e1375)</i>                           | 0.1 ± 0.1          | 0–1                  |
| <i>ced-3(n2438) dpy-4(e1166)</i>               | 1.4 ± 0.3          | 0–3                  |
| <i>daf-18(e1375) ced-3(n2438) dpy-4(e1166)</i> | 3.5 ± 0.3**        | 1–5                  |

Extra cells were scored in the anterior pharynx of L4 hermaphrodites using Nomarski optics. Data shown are mean ± s.e.m. Statistical significance values were determined by one-way ANOVA, followed by Tukey's test ( $n = 20$  animals). \* $P < 0.001$ ; compared with *ced-3(n2438)*. \*\*  $P < 0.001$ ; compared with *ced-3(n2438) dpy-4(e1166)*.

**Supplementary Table 5** *cnt-1* acts downstream of *age-1* and upstream of *akt-1*, *akt-2* and *sgk-1* to promote apoptosis.

| Genotype                                                       | No. of missing cells | Range of missing cells |
|----------------------------------------------------------------|----------------------|------------------------|
| N2                                                             | 0 ± 0                | 0                      |
| <i>cnt-1(tm2313)</i>                                           | 0 ± 0                | 0                      |
| <i>age-1(mg44)</i>                                             | 0.35 ± 0.11*         | 0–1                    |
| <i>age-1(mg44) cnt-1(tm2313)</i>                               | 0 ± 0                | 0                      |
| <i>akt-1(tm399); akt-2(tm1975) sgk-1(ok538)</i>                | 0.35 ± 0.11*         | 0–1                    |
| <i>cnt-1(tm2313); akt-1(tm399); akt-2(tm1975) sgk-1(ok538)</i> | 0.40 ± 0.11**        | 0–1                    |

Missing cells were scored in the anterior pharynx of L4 hermaphrodites using Nomarski optics. Data shown are mean ± s.e.m. Statistical significance values were determined by one-way ANOVA, followed by Tukey's test ( $n = 20$  animals). \* $P < 0.001$ , compared with N2. \*\* $P < 0.001$ , compared with *cnt-1(tm2313)*.
